# Supplementary figures and images for: Twinning mediated growth of ZnSe tri- and bi-crystal nanobelts with single crystalline wurtzite nanobelts as building blocks
Source: Royal Society of Chemistry journal article supplement (doi:10.1039/b914542g), 2009-10-07

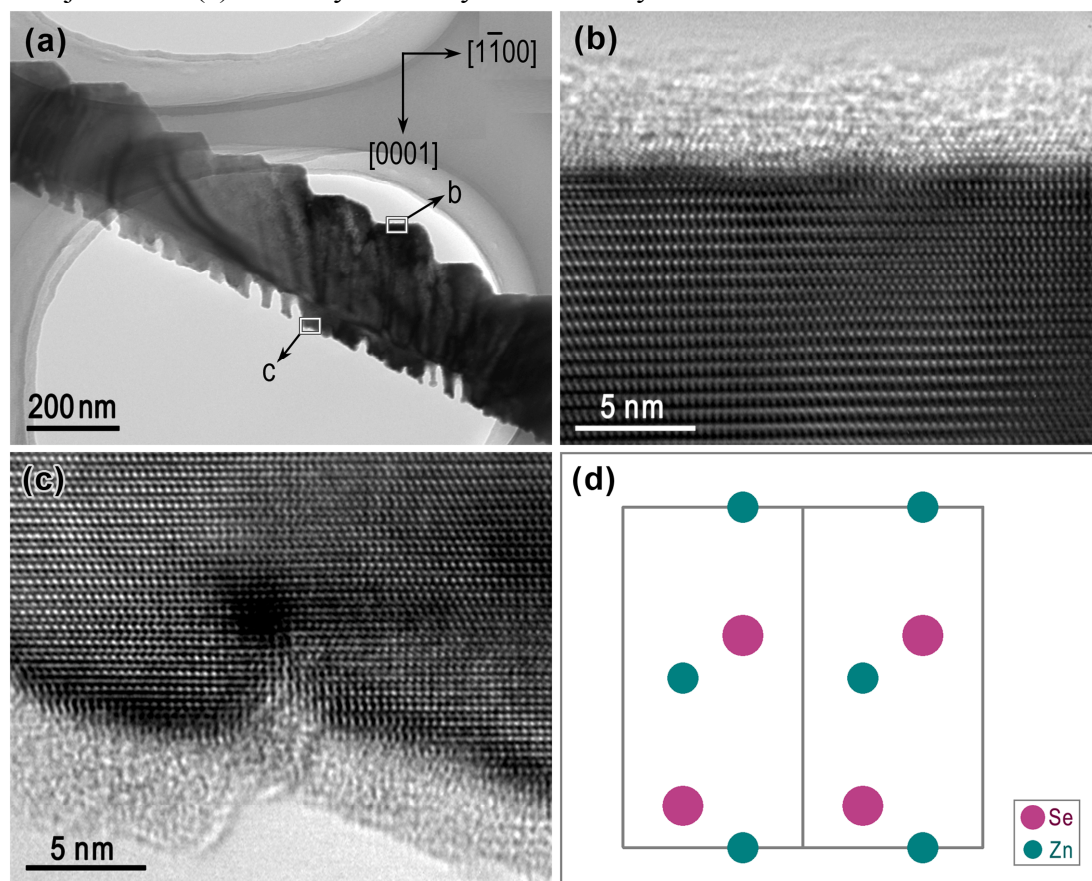

Fig. S1

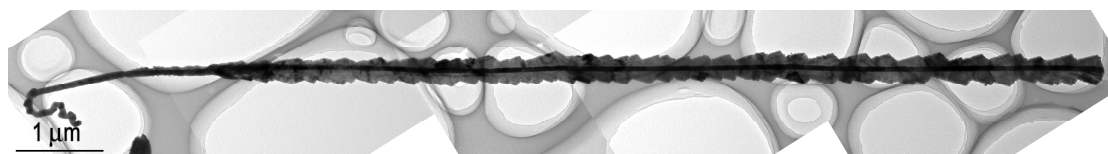

Fig. S2

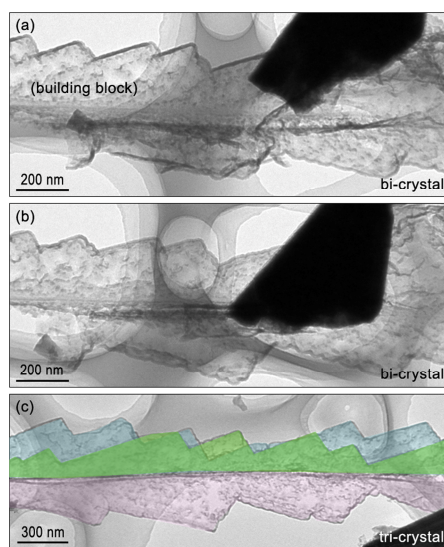

Fig. S3

Supplement: b914542g.pdf [file b914542g.pdf]
